# Supplementary material for: Performance of Simplexa Dengue Molecular Assay Compared to Conventional and SYBR Green RT-PCR for Detection of Dengue Infection in Indonesia
Source: PubMed Central journal article supplement (PMC4125142; doi:10.1371/journal.pone.0103815), 2014-08-07
Supplement: pone.0103815.s001.pdf [file pone.0103815.s001.pdf]

A. Alignment of conventional RT-PCR primers based on Lanciotti et al (1992) with DENV genome sequences from Indonesia and other countries

|            | D1 forward primer sequence<br>TCAATATGCTGAAACGCGCGAGAAACCG | D2 reverse primer sequence<br>TTGCACCAACAGTCAATGTCTTTCAGGTTTC           | Country of origin & isolate number |    |    |    |    |    |    |    |    |    |    |    |
|------------|------------------------------------------------------------|-------------------------------------------------------------------------|------------------------------------|----|----|----|----|----|----|----|----|----|----|----|
|            |                                                            |                                                                         | ID                                 | SG | TH | PH | TL | VN | AU | BN | MY | BR | VE | MX |
| Pattern 1  | . . . . . C . . . . . G . . . . .                          | . . . . . C . . . . . A . . . . . T . . . . .                           | 3                                  | 1  | 1  | -  | -  | -  | -  | 1  | 1  | -  | -  | -  |
| Pattern 2  | . . . . . C . . . . . G . . . . .                          | . . . . . A . . . . . C . . . . . A . . . . . T . . . . .               | -                                  | 3  | 1  | -  | -  | -  | 4  | -  | -  | -  | -  | -  |
| Pattern 3  | . . . . . C . . . . . G . . . . .                          | . . . . . G . . . . . A . . . . . C A . . . . . A . . . . . T . . . . . | -                                  | -  | 1  | -  | -  | -  | -  | -  | -  | -  | -  | -  |
| Pattern 4  | . . . . . C . . . . . G . . . . .                          | . . . . . G . . . . . C . . . . . A . . . . . T . . . . .               | -                                  | -  | -  | -  | -  | -  | -  | -  | -  | 2  | 2  | 2  |
| Pattern 5  | . . . . . T . . . . .                                      | . . . . . A . . . . . G . . . . .                                       | -                                  | -  | -  | -  | -  | -  | -  | -  | -  | -  | 2  | -  |
| Pattern 6  | . . . . . T . . . . .                                      | . . . . . G . . . . . A . . . . . G . . . . .                           | -                                  | -  | -  | -  | -  | -  | -  | -  | -  | -  | -  | 2  |
| Pattern 7  | . . . . . T . . . . .                                      | . . . . . G . . . . .                                                   | -                                  | 1  | 2  | -  | -  | -  | -  | -  | -  | 2  | -  | -  |
| Pattern 8  | . . . . . T . . . . .                                      | . . . . . G . . . . . C . . . . .                                       | 12                                 | 2  | -  | 1  | -  | -  | -  | -  | -  | -  | -  | -  |
| Pattern 9  | . . . . . T . . . . .                                      | . . . . . G . . . . . C . . . . . C . . . . .                           | -                                  | -  | -  | -  | 4  | -  | -  | -  | -  | -  | -  | -  |
| Pattern 10 | . . . . . T . . . . .                                      | . . . . . G . . . . . C . . . . .                                       | 1                                  | -  | -  | 1  | -  | -  | -  | -  | -  | -  | -  | -  |
| Pattern 11 | . . . . . A . . . . .                                      | . . . . . G . . . . .                                                   | -                                  | -  | 2  | -  | -  | -  | -  | -  | -  | -  | -  | -  |
| Pattern 12 | . . . . . A . . . . .                                      | . . . . . G . . . . . A . . . . .                                       | 1                                  | 1  | 1  | -  | -  | -  | -  | -  | -  | 2  | 2  | -  |
| Pattern 13 | . . . . . A . . . . .                                      | . . . . . G . . . . . A . . . . . G . . . . .                           | -                                  | -  | 3  | -  | -  | -  | -  | -  | -  | -  | -  | -  |
| Pattern 14 | . . . . . A . . . . .                                      | . . . . . G . . . . . A . . . . . C . . . . .                           | -                                  | -  | -  | 1  | -  | -  | -  | -  | -  | -  | -  | -  |
| Pattern 15 | . . . . . A . . . . .                                      | . . . . . G . . . . . A . . . . . C . . . . .                           | -                                  | -  | -  | -  | -  | -  | -  | -  | 1  | -  | -  | -  |
| Pattern 16 | . . . . . A . . . . .                                      | . . . . . A . . . . . T . . . . . T . . . . .                           | -                                  | -  | -  | -  | -  | -  | -  | -  | -  | 2  | 2  | 2  |
| Pattern 17 | . . . . . A . . . . .                                      | . . . . . T . . . . . T . . . . . T . . . . .                           | 5                                  | 3  | -  | -  | -  | 1  | -  | 1  | -  | -  | -  | -  |
| Pattern 18 | . . . . . A . . . . .                                      | . . . . . T . . . . . T . . . . . C . . . . .                           | -                                  | -  | 1  | -  | -  | -  | -  | -  | -  | -  | -  | -  |
| Pattern 19 | . . . . . A . . . . .                                      | . . . . . A . . . . . T . . . . . T . . . . . C . . . . .               | -                                  | -  | 1  | -  | -  | -  | -  | -  | -  | -  | -  | -  |
| Pattern 20 | . . . . . A . . . . .                                      | . . . . . G . . . . . C . . . . . T . . . . . T . . . . .               | -                                  | -  | -  | -  | -  | -  | 1  | -  | -  | -  | -  | -  |
| Pattern 21 | . . . . . A . . . . .                                      | . . . . . A . . . . . G . . . . . A . . . . . T . . . . .               | -                                  | -  | 1  | -  | -  | -  | -  | -  | -  | -  | -  | -  |

Country abbreviations: Indonesia (ID), Singapore (SG), Thailand (TH), Philippine (PH), Timor Leste (TL), Vietnam (VN), Australia (AU), Brunei (BN), Malaysia (MY), Brazil (BR), Venezuela (VE), Mexico (MX).

B. Alignment of Pan-dengue RT-PCR primer based on Lai et al (2007) with DENV genome sequences from Indonesia and other countries

|           | Pan-dengue forward primer sequence<br>TTGAGTAAACYRTGCTGCCTGTAGCTC | Country of origin & isolate number |    |    |    |    |    |    |    |    |    |    |    |
|-----------|-------------------------------------------------------------------|------------------------------------|----|----|----|----|----|----|----|----|----|----|----|
|           |                                                                   | ID                                 | SG | TH | PH | TL | VN | AU | BN | MY | BR | VE | MX |
| Pattern 1 | . . . . . C . . . . . G . . . . .                                 | 1                                  | -  | 1  | -  | -  | -  | -  | -  | -  | -  | -  | -  |
| Pattern 2 | . . . . . C . . . . . T . . . . .                                 | -                                  | 1  | -  | -  | -  | -  | -  | -  | -  | -  | -  | -  |
| Pattern 3 | . . . . . C . . . . .                                             | 13                                 | 7  | 9  | 3  | 4  | 4  | -  | -  | 2  | 4  | 4  | 2  |
| Pattern 4 | . . . . . A . . . . .                                             | 5                                  | 3  | 1  | -  | -  | 1  | -  | 1  | -  | 2  | -  | 2  |
| Pattern 5 | . . . . . C . . . . .                                             | -                                  | -  | 2  | -  | -  | -  | -  | -  | -  | -  | 2  | -  |
| Pattern 6 | . . . . . A . . . . . T . . . . .                                 | -                                  | -  | -  | -  | -  | 1  | -  | -  | -  | -  | -  | -  |
| Pattern 7 | . . . . . C . . . . . G . . . . .                                 | 1                                  | -  | -  | -  | -  | -  | 1  | -  | -  | 2  | -  | -  |
| Pattern 8 | . . . . . C . . . . . G . . . . . G . . . . .                     | -                                  | -  | 1  | -  | -  | -  | -  | -  | -  | 2  | -  | 2  |
| Pattern 9 | . . . . . C . . . . . G . . . . .                                 | 1                                  | -  | -  | -  | -  | -  | -  | -  | -  | -  | -  | -  |

Country abbreviations are as above.

C. GenBank accession number of DENV genomes used in primer alignments

| No | Accession No | Country   | Year | Serotype |
|----|--------------|-----------|------|----------|
| 1  | JX669474     | Brazil    | 2001 | DENV-1   |
| 2  | JX669475     | Brazil    | 2002 | DENV-1   |
| 3  | EU179861     | Brunei    | 2006 | DENV-1   |
| 4  | AB189120     | Indonesia | 1998 | DENV-1   |
| 5  | AB189121     | Indonesia | 1998 | DENV-1   |
| 6  | AY858983     | Indonesia | 2004 | DENV-1   |
| 7  | EF457905     | Malaysia  | 1972 | DENV-1   |
| 8  | KJ189369     | Mexico    | 2011 | DENV-1   |
| 9  | KJ189368     | Mexico    | 2012 | DENV-1   |
| 10 | EU081235     | Singapore | 2005 | DENV-1   |
| 11 | EU081238     | Singapore | 2005 | DENV-1   |
| 12 | EU081254     | Singapore | 2005 | DENV-1   |
| 13 | EU081280     | Singapore | 2006 | DENV-1   |
| 14 | AF180817     | Thailand  | 1963 | DENV-1   |
| 15 | AY732476     | Thailand  | 1980 | DENV-1   |
| 16 | AY732482     | Thailand  | 2001 | DENV-1   |
| 17 | HQ332182     | Venezuela | 2006 | DENV-1   |
| 18 | HQ332183     | Venezuela | 2007 | DENV-1   |
| 19 | EU249491     | Vietnam   | 2006 | DENV-1   |
| 20 | EU482525     | Vietnam   | 2006 | DENV-1   |
| 21 | EU482540     | Vietnam   | 2006 | DENV-1   |
| 22 | EU482707     | Vietnam   | 2006 | DENV-1   |
| 23 | AY037116     | Australia | 1993 | DENV-2   |
| 24 | JX669487     | Brazil    | 2000 | DENV-2   |
| 25 | JX669488     | Brazil    | 2002 | DENV-2   |
| 26 | EU179857     | Brunei    | 2005 | DENV-2   |
| 27 | AB189122     | Indonesia | 1998 | DENV-2   |
| 28 | AB189123     | Indonesia | 1998 | DENV-2   |
| 29 | AB189124     | Indonesia | 1998 | DENV-2   |
| 30 | AY858035     | Indonesia | 2004 | DENV-2   |
| 31 | AY858036     | Indonesia | 2004 | DENV-2   |
| 32 | KJ189311     | Mexico    | 2007 | DENV-2   |
| 33 | KJ189370     | Mexico    | 2011 | DENV-2   |
| 34 | EU081177     | Singapore | 2005 | DENV-2   |
| 35 | EU081178     | Singapore | 2005 | DENV-2   |
| 36 | EU081179     | Singapore | 2005 | DENV-2   |
| 37 | U87411       | Thailand  | 1984 | DENV-2   |
| 38 | DQ181801     | Thailand  | 1990 | DENV-2   |
| 39 | AF100462     | Thailand  | 1995 | DENV-2   |
| 40 | HQ332190     | Venezuela | 2007 | DENV-2   |
| 41 | HQ332189     | Venezuela | 2007 | DENV-2   |
| 42 | EU482640     | Vietnam   | 2006 | DENV-2   |
| 43 | JF808127     | Brazil    | 2002 | DENV-3   |

| No | Accession No | Country     | Year | Serotype |
|----|--------------|-------------|------|----------|
| 44 | JF808126     | Brazil      | 2003 | DENV-3   |
| 45 | AY648961     | Indonesia   | 1978 | DENV-3   |
| 46 | AY858038     | Indonesia   | 1988 | DENV-3   |
| 47 | AY858039     | Indonesia   | 1998 | DENV-3   |
| 48 | AB189125     | Indonesia   | 1998 | DENV-3   |
| 49 | AB189126     | Indonesia   | 1998 | DENV-3   |
| 50 | AB189127     | Indonesia   | 1998 | DENV-3   |
| 51 | AB189128     | Indonesia   | 1998 | DENV-3   |
| 52 | AY858037     | Indonesia   | 2004 | DENV-3   |
| 53 | AY858040     | Indonesia   | 2004 | DENV-3   |
| 54 | AY858041     | Indonesia   | 2004 | DENV-3   |
| 55 | AY858042     | Indonesia   | 2004 | DENV-3   |
| 56 | AY858043     | Indonesia   | 2004 | DENV-3   |
| 57 | AY858044     | Indonesia   | 2004 | DENV-3   |
| 58 | FJ898441     | Mexico      | 2006 | DENV-3   |
| 59 | FJ898442     | Mexico      | 2007 | DENV-3   |
| 60 | M93130       | Philippines | 1956 | DENV-3   |
| 61 | AY496879     | Philippines | 1997 | DENV-3   |
| 62 | AY766104     | Singapore   | 1995 | DENV-3   |
| 63 | EU081221     | Singapore   | 2005 | DENV-3   |
| 64 | EU081223     | Singapore   | 2005 | DENV-3   |
| 65 | AY876494     | Thailand    | 1994 | DENV-3   |
| 66 | AY923865     | Thailand    | 1994 | DENV-3   |
| 67 | AB214879     | Timor Leste | 2005 | DENV-3   |
| 68 | AB214880     | Timor Leste | 2005 | DENV-3   |
| 69 | AB214881     | Timor Leste | 2005 | DENV-3   |
| 70 | AB214882     | Timor Leste | 2005 | DENV-3   |
| 71 | HQ332171     | Venezuela   | 2006 | DENV-3   |
| 72 | HQ332170     | Venezuela   | 2006 | DENV-3   |
| 73 | JN559741     | Brazil      | 2010 | DENV-4   |
| 74 | JN983813     | Brazil      | 2010 | DENV-4   |
| 75 | AY858050     | Indonesia   | 2004 | DENV-4   |
| 76 | EF457906     | Malaysia    | 1975 | DENV-4   |
| 77 | AY947539     | Philippines | 1956 | DENV-4   |
| 78 | AY762085     | Singapore   | 1995 | DENV-4   |
| 79 | AY618991     | Thailand    | 1977 | DENV-4   |
| 80 | AY618990     | Thailand    | 1991 | DENV-4   |
| 81 | AY618988     | Thailand    | 1997 | DENV-4   |
| 82 | AY618989     | Thailand    | 1997 | DENV-4   |
| 83 | AY618993     | Thailand    | 2000 | DENV-4   |
| 84 | AY618992     | Thailand    | 2001 | DENV-4   |
| 85 | HQ332176     | Venezuela   | 2007 | DENV-4   |
| 86 | HQ332175     | Venezuela   | 2007 | DENV-4   |
